# Supplementary material for: Acute Toxicity Evaluation of Lindane-Waste Contaminated Soils Treated by Surfactant-Enhanced ISCO
Source: MDPI journal article supplement (doi:10.3390/molecules27248965), 2022-12-16
Supplement: s1 [file s1]

**Acute toxicity evaluation of lindane-waste contaminated soils  
treated by surfactant-enhanced ISCO**

Aurora Santos<sup>\*</sup>, Raúl García-Cervilla, Alicia Checa-Fernández, Carmen  
Domínguez, David Lorenzo

Dpto. Ingeniería Química y de Materiales, Facultad de Ciencias Químicas, Universidad  
Complutense Madrid. Ciudad Universitaria S/N. 28040, Madrid, Spain

Paper submitted to

**Molecules**

for consideration

**Special Issue "Residues of Organic Pollutants in Environmental Samples"**

**Supplementary Material**

Table S-1. PS (mM) flushed at each Pv

| Pv       | ISCO  | S-ISCO 5 | S-ISCO 10 |
|----------|-------|----------|-----------|
|          | PS    | PS       | PS        |
| <b>1</b> | 31.7  | 19.2     | 17.2      |
| <b>2</b> | 53.5  | 25.9     | 18.1      |
| <b>3</b> | 60.7  | 36.2     | 26.0      |
| <b>4</b> | 85.1  | 71.7     | 42.6      |
| <b>5</b> | 110.0 | 110.0    | 76.0      |
| <b>6</b> | 130.2 | 125.0    | 82.0      |
| <b>7</b> | 170.0 | 130.1    | 90.2      |
| <b>8</b> | 200.0 | 145.2    | 98.1      |

Table S-2 Composition of the 8 gathered Pvs flushed from columns T1, T2 and T3 96 h after the last Pv was eluted

| Acronym                   | C <sub>j</sub> (mg/L)               | C <sub>j</sub> (mg/L)               | C <sub>j</sub> (mg/L)               |
|---------------------------|-------------------------------------|-------------------------------------|-------------------------------------|
|                           | Σ8 PVs flushed from T1<br>(32 days) | Σ8 PVs flushed from T2<br>(32 days) | Σ8 PVs flushed from T3<br>(32 days) |
| CB                        | 0.00                                | 0.00                                | 0.00                                |
| 1,3-DCB                   | 0.00                                | 0.00                                | 0.03                                |
| 1,4-DCB                   | 0.04                                | 0.00                                | 0.01                                |
| 1,2-DCB                   | 0.03                                | 0.00                                | 0.07                                |
| 1,3,5-TCB                 | 0.02                                | 0.07                                | 0.71                                |
| 1,2,4-TCB                 | 0.84                                | 1.85                                | 18.00                               |
| 1,2,3-TCB                 | 0.12                                | 0.43                                | 3.20                                |
| TetraCB-a                 | 0.08                                | 0.69                                | 2.10                                |
| TetraCB-b                 | 0.10                                | 1.21                                | 3.20                                |
| γ-PentaCX                 | 0.00                                | 0.03                                | 0.50                                |
| PCB                       | 0.00                                | 0.01                                | 0.64                                |
| δ-PentaCX                 | 0.03                                | 0.00                                | 0.00                                |
| θ-PentaCX                 | 0.00                                | 0.00                                | 0.00                                |
| HexaCX-a                  | 0.00                                | 0.00                                | 0.00                                |
| β-PentaCX                 | 0.00                                | 0.00                                | 0.00                                |
| η-Penta CX                | 0.00                                | 0.00                                | 0.00                                |
| HexaCX-b                  | 0.00                                | 0.00                                | 0.00                                |
| HexaCX-c                  | 0.00                                | 0.00                                | 0.00                                |
| α-HCH                     | 0.00                                | 0.00                                | 0.00                                |
| HexaCX-d                  | 0.00                                | 0.00                                | 0.00                                |
| β-HCH                     | 0.00                                | 0.00                                | 0.00                                |
| γ-HCH                     | 0.00                                | 0.00                                | 0.00                                |
| HeptaCH-1                 | 0.00                                | 0.00                                | 0.00                                |
| δ-HCH                     | 0.00                                | 0.00                                | 0.00                                |
| ε-HCH                     | 0.00                                | 0.00                                | 0.00                                |
| HeptaCH-2                 | 0.00                                | 0.00                                | 0.00                                |
| HeptaCH-3                 | 0.00                                | 0.00                                | 0.00                                |
| Total COCs                | 1.26                                | 4.30                                | 28.46                               |
| PS (mM)                   | 95                                  | 86                                  | 71                                  |
| Csurf average (g/L)       | 0                                   | 0.13                                | 0.22                                |
| TUs exp <b>Eq. (5)</b>    | N.D                                 | 5.6                                 | 22.1                                |
| TUs estim. <b>Eq. (7)</b> | N.D                                 | 4.2                                 | 18.3                                |
